# Supplementary material
Source: MDPI journal article supplement (https://www.mdpi.com/2073-4433/14/2/400)
Supplement: s1 [file s1 › atmosphere-2219118-supplementary.pdf]

## Supplementary Materials:

Ju Wang <sup>1,2,3,\*</sup>, Weihao Shi <sup>1</sup>, Kexin Xue <sup>1</sup>, Tong Wu <sup>4</sup> and Chunsheng Fang <sup>1,2,3</sup>

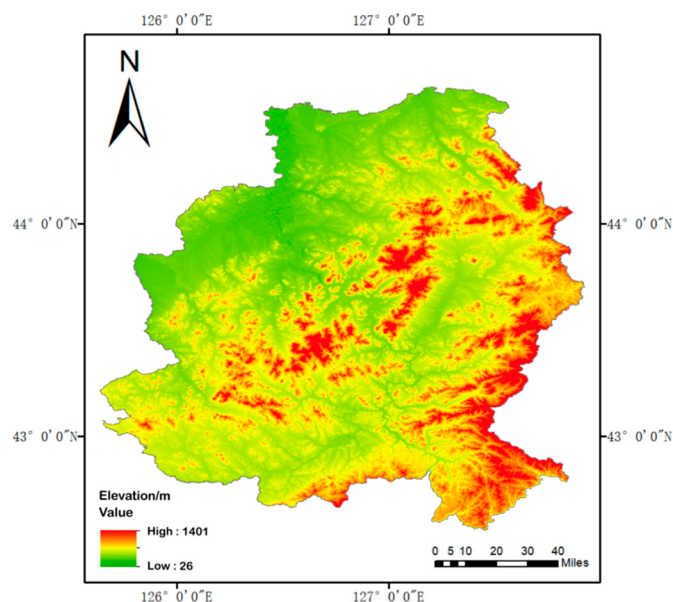

**Figure S1.** Digital Terrain Map of Jilin City.

**Table S1.** Specific Location of Monitoring Station and Meteorological Station.

| Monitoring station | East longitude | North latitude |
|--------------------|----------------|----------------|
| HDW                | 126.5553       | 43.8875        |
| DJZ                | 126.5844       | 43.8358        |
| DLXY               | 126.4978       | 43.8228        |
| JB                 | 126.5786       | 43.8947        |
| JNGY               | 126.5506       | 43.8256        |
| FM                 | 126.6772       | 43.7256        |
| JZ                 | 126.4739       | 43.9531        |
| Weather station    | 126.7521       | 42.9816        |

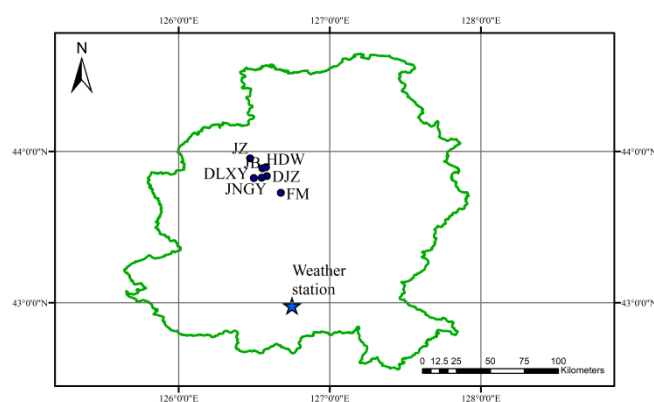

**Figure S2.** Location of Jilin Automatic Atmospheric Monitoring Station and Meteorological Station.
